# Supplementary material
Source: publisher site journal article supplement (https://neobiota.pensoft.net/article/9784/download/suppl/33/)
Supplement: Supplementary file 1

**Defining the biosecurity risk posed by transported soil: Effects of storage time and environmental exposure on survival of soil biota**

**Journal:** Neobiota

**Authors:** Mark R. McNeill1,4, Craig B. Phillips1,4, Andrew Robinson3, Lee Aalders2,4, Nicky Richards1,4, Sandra Young1, Claire Dowsett2,4, Trevor James2,4, Nigel Bell2,4,

1AgResearch, Lincoln, Private Bag 4749, Canterbury 8140, New Zealand.

2AgResearch, Ruakura Research Centre, Private Bag 3123, Hamilton 3240, New Zealand.

3CEBRA, School of Biosciences, & School of Mathematics and Statistics, University of Melbourne, Victoria 3010 Australia.

4Better Border Biosecurity, [www.b3nz.org](http://www.b3nz.org)

**Email:** [mark.mcneill@agresearch.co.nz](mailto:mark.mcneill@agresearch.co.nz)

**Table 3a** Soil chemistry of soil collected from a forest and orchard environments on 19 August 2012

| Location | Site | pH | Olsen P (µg/mL) | K (MAF QT) | S (SO4)  (ppm) | Organic sulphur (ppm) | Total phosphorus (ppm) | Cu (ppm) |
| --- | --- | --- | --- | --- | --- | --- | --- | --- |
| Forest | 1 | 6.0 | 24 | 5 | 3 | 3 | 732 | 1.5 |
|  | 2 | 6.0 | 25 | 4 | 3 | 4 | 662 | 1.7 |
|  | 3 | 5.9 | 20 | 5 | 2 | 4 | 799 | 1.8 |
| Orchard | 1 | 6.1 | 59 | 26 | 2 | 5 | 1385 | 8.4 |
|  | 2 | 5.9 | 55 | 18 | 2 | 6 | 1080 | 7.6 |
|  | 3 | 6.0 | 57 | 17 | 2 | 4 | 1090 | 6.9 |

**Table 3b** Soil chemistry of soil collected from a forest and orchard environments on 19 August 2012

| Location | Site | | Co (ppm) | | Fe (ppm) | | Mn (ppm) | | Zn (ppm) | | Organic carbon (%) | | Pseudo total nitrogen (%) | |
| --- | --- | --- | --- | --- | --- | --- | --- | --- | --- | --- | --- | --- | --- | --- |
| Forest | | 1 | | 1.6 | | 985 | | 160 | | 6.7 | | 4.3 | | 0.36 | |
|  | | 2 | | 2.0 | | 1285 | | 190 | | 5.7 | | 3.2 | | 0.29 | |
|  | | 3 | | 2.1 | | 1020 | | 230 | | 6.7 | | 3.8 | | 0.35 | |
| Orchard | | 1 | | 1.3 | | 485 | | 160 | | 14.0 | | 5.1 | | 0.47 | |
|  | | 2 | | 1.5 | | 500 | | 160 | | 10.9 | | 4.1 | | 0.44 | |
|  | | 3 | | 1.3 | | 450 | | 115 | | 6.1 | | 2.8 | | 0.25 | |
